# Supplementary material
Source: PubMed Central journal article supplement (PMC6738804)
Supplement: jin-0009-0033-s01.pdf [file jin-0009-0033-s01.pdf]

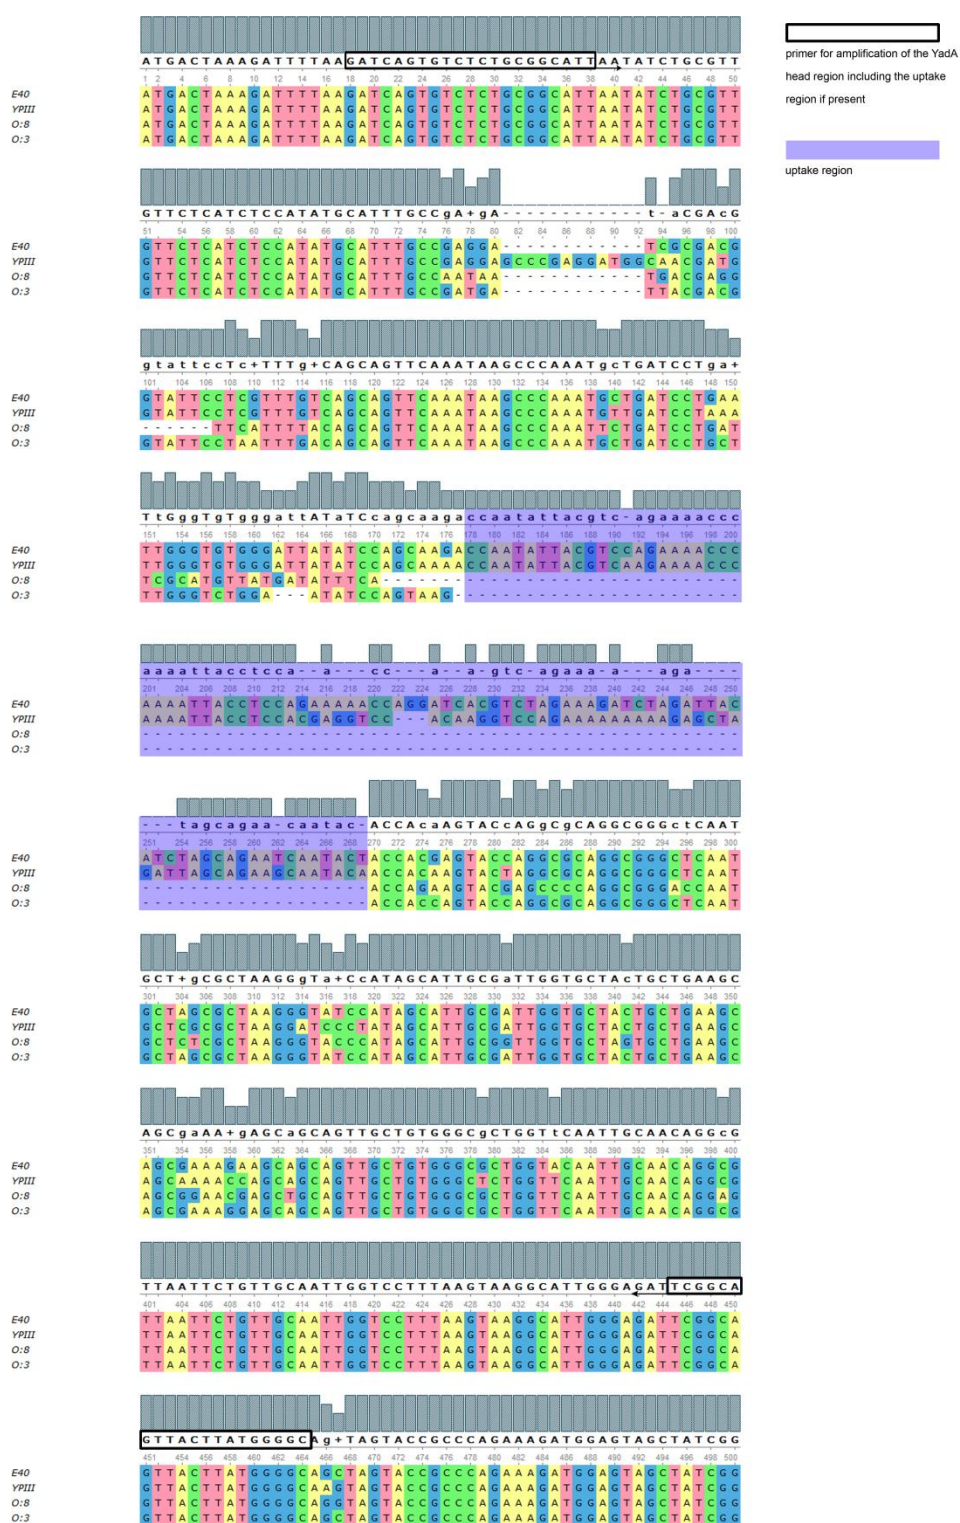

**Fig. S1 DNA sequence alignment of YadA from *Ye* strains of different serotypes.** DNA alignment of YadA of *Ye* O:9 E40 (E40), O:8 WA-314 (O:8), O:3 6471/76 (O:3) and *Yps* YPIII (YPIII). Alanine is given in yellow, tyrosine in red, guanine in blue and cytosine in green. Amino acid conservation among the different *Yersinia* strains is shown in the grey bars above. The “uptake region” is highlighted in lilac. Primers that were chosen for PCR amplification of the YadA head region are indicated by black boxes.
