# Supplementary material
Source: PubMed Central journal article supplement (PMC6738804)
Supplement: jin-0009-0033-s02.pdf [file jin-0009-0033-s02.pdf]

```

YPS YPIII      MTKDFKISVSAALISALFSSPYAFAEPEPEDGNDGIPRLSAVQISPNDPKLVGLYPAKPILRQENPKLPPRGPQGP-EKKRRARLAEATQPQVLGAGGLNARAKDPYSIAIGATAEAAKPAAVAVGSGSIATGVNSVAIGPLSKALGDSA
YE 09 E40      MTKDFKISVSAALISALFSSPYAFAE----DRDGI PRLSAVQISPNDPELVGLYPARPILRPENPKLPPEKPGSRLESLRLHLAESILPRVPGAGGLNASAKGIHSIAIGATAEAAKEAAVAVGAGTIATGVNSVAIGPLSKALGDSA
YE 08 WA-314   MTKDFKISVSAALISALFSSPYAFAN-----NDEV-HFTAVQISPNSDPDSHVMI FQPE-----VRAPGGTNALAKGTHSIAVGASAEAAERA AVAVGAGSIATGVNSVAIGPLSKALGDSA
YE 08 8081     MTKDFKISVSAALISALFSSPYAFAN-----NDEV-HFTAVQISPNDPDSHVVI FQPA-----AEALGGTNALAKSIHSIAVGASAEAAKQA AVAVGAGSIATGVNSVAIGPLSKALGDSA
YE 03 6471/76 MTKDFKISVSAALISALFSSPYAFAD----DYDGI PNLTA VQISPNDPALGLEYPVRPP-----VPGAGGLNASAKGIHSIAIGATAEAAKGA AVAVGAGSIATGVNSVAIGPLSKALGDSA

YPS YPIII      VTYGASSTAQKDGVAIGARASASDTGVAVGFNSKVDAQNSVAIGHSSHVAADHGY SIAIGDHSKTDRENSVSI GHESLNRQLTHLAAGTEDTDAVNVAQLKKE-----AETLE
YE 09 E40      VTYGAASTAQKDGVAIGARASTSDTGVAVGFNSKADAKNSVAIGHSSHVAVVDHDY SIAIGDRSKTDRENSVSI GHESLNRQLTHLAAGTKD TDAVNVAQLKKEIEKTQENTNKKSAELLANANAYADNKSSSVLGIANNYTD SKSAETLE
YE 08 WA-314   VTYGAGSTAQKDGVAIGARASTSDTGVAVGFNSKVDAKNSVAIGHSSHVVVDHDY SIAIGDRSKTDRKNSVSI GHESLNRQLTHLAAGTKD TDAVNVAQLKKEIEKTQENANKKSAE-----VLGIANNYTD SKSAETLE
YE 08 8081     VTYGAASTAQKDGVAIGARASTSDTGVAVGFNSKVDAKNSVAIGHSSHVAVVDHDY SIAIGDRSKTDRKNSVSI GHESLNRQLTHLAAGTKD TDAVNVAQLKKEIEKTQVNANKKSAE-----VLGIANNYTD SKSAETLE
YE 03 6471/76 VTYGAASTAQKDGVAIGARASTSDTGVAVGFNSKADAKNSVAIGHSSHVAANHGY SIAIGDRSKTDRENSVSI GHESLNRQLTHLAAGTKD TDAVNVAQLKKEIEKTQENTNKRSAELLANANAYADNKSSSVLGIANNYTD SKSAETLE

YPS YPIII      NARKEFLAQSNDVLDAAK-----KHSNSVARTTLETAEEHANKKSAELVSAKVYADSNSSHTLKTANSYTDVTVSSSTKKAISESNQYTDHKFSQLDNRLDKLDRVDKGLASSAALNSLFQPYGVGKVNFTAGVGGYR
YE 09 E40      NARKEFAQSKDVLNMAKAHSNSVARTTLETAEEHANSVARTTLETAEEHANKKSAELASANVYADSKSSHTLKTANSYTDVTVSNSTKKAIRESNQYTDHKFRQLDNRLDKLDRVDKGLASSAALNSLFQPYGVGKVNFTAGVGGYR
YE 08 WA-314   NARKEAFDLSNDALDMAK-----KHSNSVARTTLETAEEHTNKKSAETLASANVYADSKSSHTLKTANSYTDVTVSNSTKKAIRESNQYTDHKFHQLDNRLDKLDRVDKGLASSAALNSLFQPYGVGKVNFTAGVGGYR
YE 08 8081     NARKEAFDLSNDALDMAK-----KHSNSVARTTLETAEEHTNKKSAETLARANVYADSKSSHTLQTANSYTDVTVSNSTKKAIRESNQYTDHKFRQLDNRLDKLDRVDKGLASSAALNSLFQPYGVGKVNFTAGVGGYR
YE 03 6471/76 NARKEFAQSKDVLNMAKAHSNSVARTTLETAEEHANSVARTTLETAEEHANKKSAELASANVYADSKSSHTLKTANSYTDVTVSNSTKKAIRESNQYTDHKFRQLDNRLDKLDRVDKGLASSAALNSLFQPYGVGKVNFTAGVGGYR

YPS YPIII      SSQALAIGSGYRVNESVALKAGVAYAGSSDVMYNASFNIEW
YE 09 E40      SSQALAIGSGYRVNENVALKAGVAYAGSSDVMYNASFNIEW
YE 08 WA-314   SSQALAIGSGYRVNESVALKAGVAYAGSSDVMYNASFNIEW
YE 08 8081     SSQALAIGSGYRVNESVALKAGVAYAGSSDVMYNASFNIEW
YE 03 6471/76 SSQALAIGSGYRVNENVALKAGVAYAGSSDVMYNASFNIEW

```

BLUE: SIGNAL PEPTIDE  
 GREEN: NECK  
 RED: CANONICAL YADA HEAD REPEATS  
 ORANGE: MEMBRANE ANCHOR

**Fig. S2 Alignment of YadA sequences.** Kalign/Muscle alignment of YadA of *Yps* YPIII, *Ye* O:9 E40, *Ye* O:8 WA-314, *Ye* O:8 8081 and *Ye* O:3 6471/76. The signal peptide is given in blue, the neck region is given in green and the membrane anchor domain is given in yellow. Canonical YadA head repeats are highlighted in red.
