# Supplementary material
Source: PubMed Central journal article supplement (PMC6738804)
Supplement: jin-0009-0033-s03.pdf [file jin-0009-0033-s03.pdf]

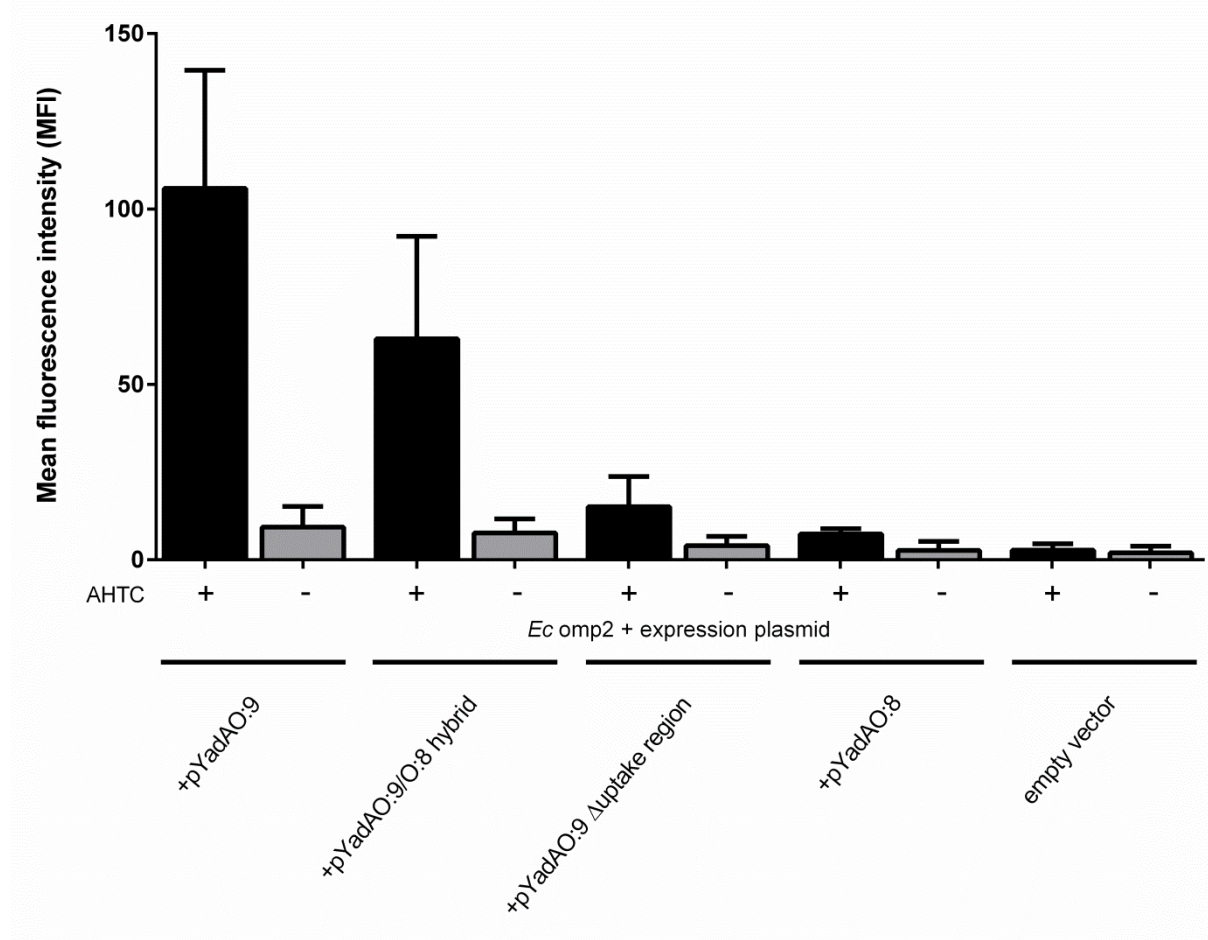

**Fig. S3 Vn binding assay analysed by flow cytometry.** YadA constructs were expressed in *E.coli* omp2 (Prilipov et al., 1998) and Vn binding from serum was quantified by staining with antibodies directed against Vn and flow cytometry. YadA that contains the “uptake region” (i.e. YadA O:9 and the hybrid YadAO:9/O:8) mediates efficient binding of Vn to the surface of *E.coli* (- = not induced; + = induced with anhydrotetracycline (AHTC) 1:10000). Data are means  $\pm$  SD of three individual experiments.
