# Supplementary material
Source: PubMed Central journal article supplement (PMC6738804)
Supplement: jin-0009-0033-s04.pdf [file jin-0009-0033-s04.pdf]

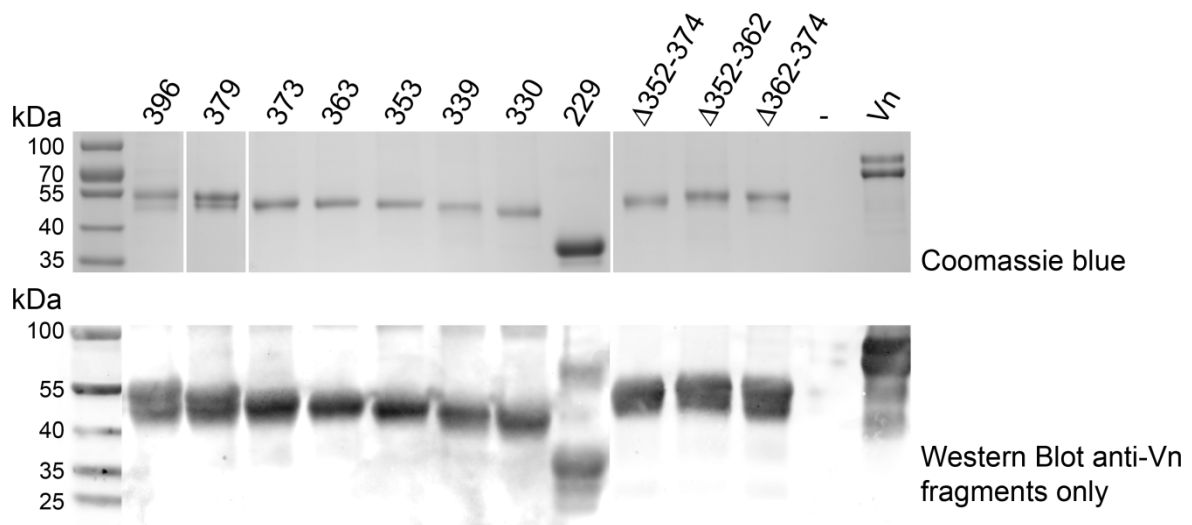

**Fig. S4 Quality control of Vn fragments.** Integrity and amount of purified Vn fragments was tested by a Coomassie gel and a Western Blot. All fragments have the expected size and concentration and can be detected with the used anti-Vn antibody in comparable sensitivity. One representative experiment out of three is shown.
