# Supplementary material
Source: PubMed Central journal article supplement (PMC6738804)
Supplement: jin-0009-0033-s05.pdf [file jin-0009-0033-s05.pdf]

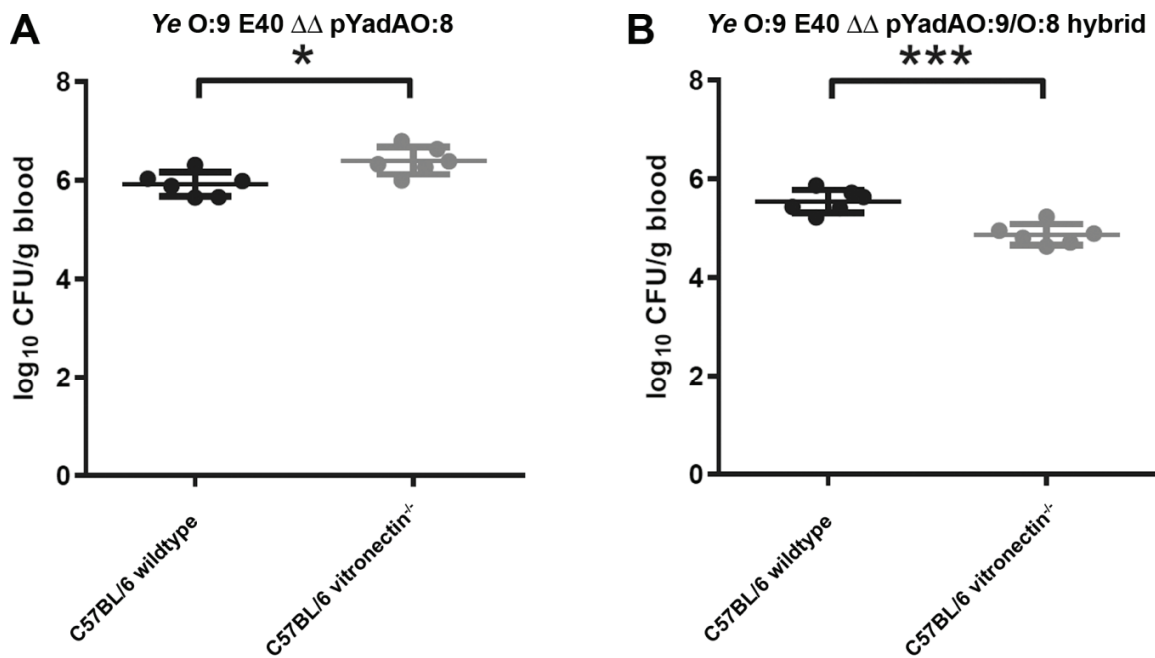

**Fig. S5 Comparison of *Ye* O:9 E40 expressing YadAO:8 or the YadAO:9/O:8 hybrid protein in an *in vivo* serum killing assay.** Wildtype and Vn<sup>-/-</sup> mice were infected intravenously with  $1 \times 10^7$  *Ye* O:9 E40 for 30 min. After that, mice were killed, blood was withdrawn and plated on selective agar plates. The bacterial load was determined by counting colonies the next day and is shown as log<sub>10</sub> CFU per g blood. The p value for the comparison of C57BL/6 and Vitronectin<sup>-/-</sup> mice was determined by Student t test (B). The horizontal lines denote the mean, the error bars the SD. \* p < 0.05; \*\* p < 0.01, \*\*\* p < 0.001, \*\*\*\* p > 0.0001, , n=6.
